# Supplementary material for: UltraSEQ, a Universal Bioinformatic Platform for Information-Based Clinical Metagenomics and Beyond
Source: PubMed Central journal article supplement (PMC10269449; doi:10.1128/spectrum.04160-22), 2023-04-11
Supplement: spectrum.04160-22-s0001.pdf [file spectrum.04160-22-s0001.pdf]

1 **Supplementary Materials**

2 This manuscript contains the following supplemental materials:

3 Supplement A – Detailed UltraSEQ Services (this document)

4 Supplement B – Other UltraSEQ Services (this document)

5 Supplement C – Sample-report\_user guide (separate Excel Document)

6 Supplement D – Supplemental\_File\_Scores (separate Excel Document)

7 Supplement E – UltraSEQ Rules Engine Logic (this document)

8 Supplement F – Supplemental Results (this document)

## 9 Supplement A – Detailed UltraSEQ Services

10 **Preprocessing Service.** For datasets derived from sequencers, UltraSEQ's preprocessing  
11 routine includes steps to trim low quality sequence regions, remove adapter sequences,  
12 (optionally) merge paired end reads, and (optionally) remove host sequences to ensure optimal  
13 reads remain for analysis. For Illumina and IonTorrent datasets, Trimmomatic v0.39 (Bolger et  
14 al., 2014) was used for quality trimming/adaptor removal (settings include  
15 ILLUMINACLIP:NexteraPE-PE.fa:2:30:10:2:keepBothReads, LEADING:3 TRAILING:3  
16 SLIDINGWINDOW:5:20 MINLEN:50) and Fastp v0.23.0 (Chen et al., 2018) was used for paired  
17 end read merging and deduplication (settings include -m (R1/R2 merging mode) when  
18 applicable, -dedup, -Q -A (disable quality and adapter trimming). *[Note: subsequent to this  
19 publication, UltraSEQ preprocessing routine was updated to use Fastp for quality  
20 trimming/adaptor removal and merging in one step with the following setting: -m (R1/R2 merging  
21 mode), -cut\_front -cut\_front\_window\_size 1 -cut\_front\_mean\_quality 3 (mimics Trimmomatic  
22 LEADING:3), -cut\_tail -cut\_tail\_window\_size 1 -cut\_tail\_mean\_quality 3 (mimics Trimmomatic  
23 TRAILING: 3), -cut\_right -cut\_right\_window\_size 5 -cut\_right\_mean\_quality 20 (mimics  
24 Trimmomatic SLIDINGWINDOW:4:20), -l 50. A second step was used to deduplicate the  
25 dataset if necessary due to interference of Fastp's -cut\_right setting on -dedup. We found that  
26 this pipeline provides 1.5x speed increase, ~1.07x more usable reads, and automatic adaptor  
27 removal (data not shown)].* Following trimming and adapter removal, Bowtie2 v2.3.5.1  
28 (Langmead & Salzberg, 2012) was used with default settings to remove host reads that  
29 produced an alignment to the human genome build GRCh38. For Nanopore datasets, Porechop  
30 v0.2.4 (Wick et al., 2017) was used with default settings to remove adapters and MiniMap2  
31 v2.24-r1122 (Li, 2018) was used with default settings to remove any reads that produced an  
32 alignment to human genome build GRCh38. FastQC v0.11.9 (Andrews, 2010) and MultiQC  
33 v1.10.1 (Ewels et al., 2016) were used to evaluate pre-processed and post-processed standard  
34 data quality metrics and ensure preprocessing routines were effective.

35 To ensure the most informative reads are passed to the next UltraSEQ service, an additional  
36 de-duplication step is performed by removing any duplicates that have an exact match for the  
37 first 50 bases. Such duplication is known to occur during the library preparation step (Head et  
38 al., 2014). Further, to reduce cloud compute costs, enhance run-times, and provide better  
39 comparisons across datasets, subsampling was optionally performed prior to the alignment  
40 service described below. Subsampling was performed by calculating the average number of bps  
41 per read in a sample, then randomly sampling to the number of reads required to reach  
42 10,100,000 total bps (note: the subsampling was performed by bps instead of number of reads  
43 since some datasets, e.g., nanopore, have much longer reads). Subsampling was performed on  
44 all datasets (if needed) with the exception of a second set of runs that was performed for  
45 Yang et al. (Yang et al., 2019) datasets for antibiotic resistance genotyping. For these runs, a  
46 separate UltraSEQ run was used in which the full sample was run without de-hosting to  
47 enhance signals for antibiotic resistance genes (with the exception of the following samples that  
48 were subsampled to 30,000 reads: Case 22, 10, 9, and 4; these were subsampled to 30,000  
49 reads to reduce computational runtime).

50 **Aligner Service.** To avoid sequences with lengths longer than LAMBDA2's maximum query  
51 length, sequences longer than 5,000 bps were chunked in pieces of maximum size 5,000.

52 LAMBDA2 enables alignment against both protein and nucleotide databases, but the results for  
53 this study leveraged only protein databases, including the Uniref100 protein database (built April  
54 2021) and Battelle’s Sequence of Concern protein database, which contains ~8,000 sequences  
55 of concern (including virulence factors, toxins, bioregulators, pathways of concern, etc.), ~500  
56 signatures of genetic engineering, and ~3,500 biological agents, including ~2,800 pathogens  
57 (~2,600 human pathogens) as detailed here (Gemler et al., 2022). For selected runs, we also  
58 leveraged our curated nucleotide database of human pathogens and select agents, although  
59 these data are not shown here, as no improvement to results was noticed. For this study, the  
60 following aligner settings were used: e-value = 1e-4, maximum number matches = 10, aligner's  
61 seed-delta-increases-length flag = ON.

62 **Query Mapper Service:** This service maps regions within query sequences to identify high  
63 quality alignment regions as well as chimeric reads / out-of-context DNA sequences. This  
64 service processes the raw alignment results from the aligner service and identifies top alignment  
65 results by first finding the top percent identity and then subsetting the raw alignment results to  
66 alignments whose percent identity is within a tolerance, by default 1%, of the top percent  
67 identity. The top alignment results are subsequently processed for positional information from  
68 each database used, including protein and nucleotide databases. For each query position,  
69  $n_{counts}$  is defined as the total number of query alignment starts and query alignment stops  
70 corresponding to that position. After  $n_{counts}$  has been populated at every position, a normalized  
71 vector of counts ( $N_{counts}$ ) is compiled according to equation 1:

72 Equation 1

73 
$$N_{counts} = \frac{n_{counts} - \text{Min}(n_{counts})}{\text{Max}(n_{counts}) - \text{Min}(n_{counts})}$$

74 Following these calculations, a K-means clustering is performed for the  $N_{counts}$  values, and the  
75 top cluster is used to define the region bounds. Specifically, kmeans++ (Arthur & Vassilvitskii,  
76 2007) is used to set the initial centroids. For this application, the “furthest point” algorithm  
77 sequentially selects initial centroids furthest from the ones in the previous iteration. Lloyd’s  
78 Algorithm (Lloyd, 1982) is then used for clustering given those initial centroids. Finally, the  
79 Elbow Method (Ng, 2012) is used to determine the best number of groups k. The top cluster is  
80 defined as the cluster with the largest centroid. Further, as implemented within UltraSEQ, the  
81 algorithm checks if the top two clusters’ centroids are within a particular tolerance (10% in the  
82 case of the query mapper); if they are, the penultimate cluster is absorbed into the top cluster  
83 (otherwise, the top cluster remains unaltered).

84 To illustrate these calculations, consider the following example: one query sequence of length  
85 150 bps aligns to 3 different subject sequences, with the following start and stop query positions  
86 (and percent identities): Accession A, start position 1, end position 100 (percent identity = 100);  
87 Accession B, start position 1, end position 50 (percent identity = 95); Accession C, start position  
88 25, end position 100 (percent identity = 100). In this case,  $n_{counts} = 195, 100, 95,$  and  $200$  and  
89  $N_{counts} = 0.952, 0.0476, 0,$   $1.000,$  for positions 1, 25, 50, and 100, respectively. In this case, the  
90 top K-means cluster includes  $N_{counts}$  values 0.95 and 1.000 associated with query positions 1  
91 and 100, respectively. Query positions 1 and 100 then define the region bounds. The region

92 bounds are subsequently applied to the query sequence, and any overhangs of sufficient length  
93 (default: 6 bps) can optionally be classified as their own region (overhangs that are less than the  
94 sufficient length threshold are ignored). The default setting for this study was to generate  
95 overhangs when possible. The query mapper also defines the region's type: if the region has  
96 one or more alignments derived from a protein database, it is defined as a "translated" region; if  
97 it only has alignments from a nucleotide database, it is defined as an "untranslated" region; if no  
98 alignments are identified, it is defined as a "novel" region. Further, for translated regions, the  
99 reading frame(s) is documented based on the alignment. UltraSEQ provides the option to re-  
100 align novel regions for greater depth of analysis, but this option was not used in this study. In  
101 the example presented here, two regions would be identified: one from query positions 1 to 100,  
102 and the second from query positions 101 to 150.

103 **Context Services and Subservices.** These services generate contextual information and  
104 passes information to downstream services. The **Metadata Service** maps metadata to  
105 alignment results. For UniRef100 alignments, these metadata include Gene Ontology terms,  
106 UniProt identifiers, UniRef100 identifiers (which are linked to proteins involved in genetic  
107 engineering, housed within Battelle's SoC database), taxonomy identifiers (also linked to  
108 Battelle's SoC database for agent metadata), and other. For SoC alignments, these metadata  
109 further include tags such as coarse functionality (adherence, antibiotic resistance, etc.),  
110 pathways, SoC groups, etc. as defined in (Gemler et al., 2022). For nucleotide alignments,  
111 current metadata includes taxonomic identifiers. Other context services available for use but not  
112 used in this study are described in the Supplement B - Other UltraSEQ Services.

113 **Rules Engine Service.** This service combines all of the above context and prediction services  
114 for regions, sequences, and samples using user defined logic rules for rapid sequence triage.  
115 UltraSEQ currently has 4 default rules engines to identify biothreats, controlled sequences for  
116 DNA synthesis vendors, indicators of genetic engineering, and Metagenomics Diagnostics. The  
117 first three are not described here as they are specific to various use cases. The fourth is  
118 described in the main methods of the manuscript.

119 **Metagenomics Service.** This service provides sample level taxonomic composition based on  
120 the regions identified from reads processed in the query mapper service in 3 steps: 1) filtering  
121 out low quality reads, 2) scoring the remaining reads based on the information content of the  
122 reads, and 3) predicting the taxonomic composition based on the scores. In the first step, the  
123 default alignment quality filters used in this study include minimum alignment length of 48 base  
124 pairs (16 amino acids set based on aligner seed length), 99% percent identity and 100% region  
125 coverage for nucleotide alignments (note: no nucleotide databases were used in this study),  
126 95% percent identity and 90% region coverage for protein alignments.

127 The metagenomics service works by estimating the information content of a read. That is, reads  
128 that are unique to a protein from a specific organism contain the highest amount of information,  
129 whereas reads that are found in proteins from across the tree of life contain less information.  
130 The information content of a read is derived from the read's alignment data, in which the value  
131 of its information content is inversely proportional to the product of the number of unique  
132 accessions and taxonomies associated with high-quality alignments of a region – i.e., a region  
133 that contains a single accession and taxonomy call is more useful than a region that contains

134 many accession and taxonomy calls. We note that the default protein reference database used  
135 in this study, the UniRef100, clusters proteins with 100% similarity to each other into a single  
136 reference accession. This clustering feature is important for the metagenomics service's  
137 efficacy, since it prevents reference database duplication from incorrectly lowering the perceived  
138 information content of a region (e.g., duplicates of the same protein are represented by a single  
139 UniRef100 cluster, which would appear as a single subject accession in this study).

140 Sequence region-level taxonomy predictions are associated with confidence scores that are  
141 based on alignment quality. For each unique taxonomy identified, the maximum confidence  
142 score from alignments that are associated with it are assigned. Specifically, based on the results  
143 of the query mapper service, all region alignments are compiled in a table ("query sequence  
144 information table"), and scoring is initially performed on a per region, per agent (organism), per  
145 accession basis. More specifically, each region ( $r$ ), agent ( $a$ ), and accession ( $acc$ ) combination  
146 is assigned the following score,  $S_{a,r,acc}$ :

$$147 \quad S_{a,r,acc} = \frac{Aqual_{acc,r}}{Na_r \times Nacc_r}$$

148 Where  $Aqual_{acc,r}$  is the alignment quality (percent coverage x percent identity) in the region,  
149  $Na_r$  is the number of unique agents associated with the subject accessions in the region (score  
150 is inversely proportional to the region's uniqueness) and  $Nacc_r$  is the number of accessions  
151 from the subject database that are associated with the region (score is inversely proportional to  
152 the region's sequence complexity – higher complexity implies more specificity to a specific  
153 protein). Subsequently, an agent region score,  $S_{a,r}$ , is calculated to be the score associated with  
154 the highest scoring accession (or accessions in the case of a tie) for the given agent, region  
155 combination:

$$156 \quad S_{a,r} = \max_{acc} S_{a,r,acc}$$

157 For each unique taxonomy across the sample, the agent scores  $S_{a,r}$  are summed across all  
158 regions for which each taxonomy is associated, and the sample-level or agent score ( $S_a$ ) is  
159 calculated:

$$160 \quad S_a = \sum_r S_{a,r}$$

161 At this point, the agent score ( $S_a$ ) are rank ordered, and starting with highest sample-level  
162 scoring taxonomy, all sequences associated with the highest scoring taxonomy are identified  
163 and all other taxonomies associated with those sequences are removed from the query  
164 sequence information table (as defined above). This process is iteratively repeated until all  
165 taxonomies have been processed. The result is a pruned list of agent scores ( $S_a$ ) and their  
166 associated TaxIDs. From this list, a K-means cluster of the agent scores is performed by  
167 domain (Bacteria, Archaea, Eukaryotes, and Viruses) using the same method as described  
168 above for the Query Mapper Service, and the taxonomies associated with the top cluster in  
169 each domain are set to be the final sample composition. As with the query mapper, the  
170 algorithm checks if the top two clusters' centroids are within a particular tolerance, referred to as

171 the metagenomic clustering threshold (MCT) in the main body of the manuscript; if they are, the  
172 penultimate cluster is absorbed into the top cluster (otherwise, the top cluster remains  
173 unaltered). In this case, a 50% MCT was used for all UltraSEQ runs except during testing  
174 phases as described in the Results Section. The final confidence associated with each agent,  
175  $C_a$ , is defined as the average alignment quality for all sequences used in the final (pruned) query  
176 sequence information table for that agent. Note, due to the high abundance of phages, all  
177 TaxIDs associated with phages and other similar non-human viruses were masked from these  
178 calculations. This masking was accomplished by creating a removal list of all NCBI viral TaxID  
179 associated with the following hosts: fungi, bacteria, algae, archaea, diatom, and protozoa.

180 **Reporting Services.** UltraSEQ provides several reports as well as described below. The text  
181 below describes the details of these reports as of the writing of this manuscript, although we  
182 anticipate additions/modifications as appropriate. Details for the *Top Alignment Report*,  
183 *Taxonomy Report*, and *Default Report* are provided in the main section of the manuscript.  
184 Additional details for the sample report are provided here.

185 **Sample Report.** As described in the main methods section of the manuscript, the ‘main report’  
186 tab provides a list of all organisms identified from the above Metagenomics Service, the results  
187 associated with the identified organisms, and the metadata associated with the organism from  
188 Battelle’s SoC database. These results and metadata are used in a logical diagnostic rules  
189 engine described in the ‘trigger-summary’ tabs. Statistics for the UltraSEQ run are provided in  
190 the ‘sample-statistics’ tab. For each organism identified, the ‘VF’ tab provides a list of SoCs  
191 identified, including virulence factors and antibiotic resistance genes from the Comprehension  
192 Antibiotic Resistance Database (CARD) (Alcock et al., 2020). Specifically, if an alignment to one  
193 of the proteins in the SoC database is contained within the Top Alignment Report and its TaxID  
194 matches to the organism or one of its children, it is populated in the organism-specific ‘VF’ tab.  
195 For antibiotic resistance profiles, only proteins in the CARD’s protein homology model are  
196 currently used. These protein sequences are currently populated in Battelle’s SoC database, but  
197 some metadata associated with these sequences and the drugs they confer resistance to  
198 defined by CARD (e.g., in the aro.tsv and ro.tsv files provided by CARD downloads  
199 <https://card.mcmaster.ca/download>). The ‘ABR’ tab pulls results from the ‘VF’ tab to provide  
200 antibiotic resistance information. Information in this tab is organized by drug class and antibiotic  
201 for easy interpretation. Other antibiotic resistance models (e.g., protein variant model, rRNA  
202 gene variant model, and protein knockout model, etc.) are not currently used in UltraSEQ. Thus,  
203 antibiotic resistance profiles are currently based solely on presence of genes that confer  
204 antibiotic resistance (i.e., profiles are not based on point mutants that may help confer  
205 resistance). In addition to the organism-specific antibiotic resistance profile, an organism-  
206 specific agnostic profile is provided in the ‘CARD SoCs Report’ tab to further aid in antibiotic  
207 resistance genotyping (in cases where antibiotic genes may map to the incorrect or many  
208 different taxonomies).

209

210 **References for Supplemental Section A**

- 211 1. Alcock, B. P., Raphenya, A. R., Lau, T. T. Y., Tsang, K. K., Bouchard, M., Edalatmand, A., Huynh,  
212 W., Nguyen, A. V., Cheng, A. A., Liu, S., Min, S. Y., Miroshnichenko, A., Tran, H. K., Werfalli, R. E.,  
213 Nasir, J. A., Oloni, M., Speicher, D. J., Florescu, A., Singh, B., . . . McArthur, A. G. (2020). CARD  
214 2020: antibiotic resistance surveillance with the comprehensive antibiotic resistance database.  
215 *Nucleic Acids Res*, 48(D1), D517-D525. <https://doi.org/10.1093/nar/gkz935>  
216 2. Andrews, S. (2010). *FastQC: A Quality Control Tool for High Throughput Sequence Data [Online]*.  
217 Available online at: <http://www.bioinformatics.babraham.ac.uk/projects/fastqc/>.  
218 3. Arthur, D., & Vassilvitskii, S. (2007). K-means++: the advantages of careful seeding. SODA'07  
219 Proceedings of the Eighteenth Annual ACM-SIAM Symposium on Discrete Algorithms.  
220 CityPhiladelphia, StatePA: placecountry. In: region SIAM Press.  
221 4. Bolger, A. M., Lohse, M., & Usadel, B. (2014). Trimmomatic: a flexible trimmer for Illumina  
222 sequence data. *Bioinformatics*, 30(15), 2114-2120.  
223 <https://doi.org/10.1093/bioinformatics/btu170>  
224 5. Chen, S., Zhou, Y., Chen, Y., & Gu, J. (2018). fastp: an ultra-fast all-in-one FASTQ preprocessor.  
225 *Bioinformatics*, 34(17), i884-i890. <https://doi.org/10.1093/bioinformatics/bty560>  
226 6. Ewels, P., Magnusson, M., Lundin, S., & Kaller, M. (2016). MultiQC: summarize analysis results  
227 for multiple tools and samples in a single report. *Bioinformatics*, 32(19), 3047-3048.  
228 <https://doi.org/10.1093/bioinformatics/btw354>  
229 7. Gemler, B. T., C., M., A., H. C., D., H., Z., S., J., H. L., O., T., & C., B. (2022). Function-based  
230 Classification of Hazardous Biological Sequences: Demonstration of a New Paradigm for  
231 Biohazard Assessments (Submitted for Publication).  
232 8. Head, S. R., Komori, H. K., LaMere, S. A., Whisenant, T., Van Nieuwerburgh, F., Salomon, D. R., &  
233 Ordoukhanian, P. (2014). Library construction for next-generation sequencing: overviews and  
234 challenges. *Biotechniques*, 56(2), 61-64, 66, 68, passim. <https://doi.org/10.2144/000114133>  
235 9. Langmead, B., & Salzberg, S. L. (2012). Fast gapped-read alignment with Bowtie 2. *Nat Methods*,  
236 9(4), 357-359. <https://doi.org/10.1038/nmeth.1923>  
237 10. Li, H. (2018). Minimap2: pairwise alignment for nucleotide sequences. *Bioinformatics*, 34(18),  
238 3094-3100. <https://doi.org/10.1093/bioinformatics/bty191>  
239 11. Lloyd, S. (1982). Least squares quantization in PCM. *IEEE transactions on information theory*,  
240 28(2), 129-137.  
241 12. Ng, A. (2012). Clustering with the k-means algorithm. *Machine Learning*, 1-2.  
242 13. Wick, R. R., Judd, L. M., Gorrie, C. L., & Holt, K. E. (2017). Completing bacterial genome  
243 assemblies with multiplex MinION sequencing. *Microb Genom*, 3(10), e000132.  
244 <https://doi.org/10.1099/mgen.0.000132>  
245 14. Yang, L., Haidar, G., Zia, H., Nettles, R., Qin, S., Wang, X., Shah, F., Rapport, S. F., Charalampous,  
246 T., Methe, B., Fitch, A., Morris, A., McVerry, B. J., O'Grady, J., & Kitsios, G. D. (2019).  
247 Metagenomic identification of severe pneumonia pathogens in mechanically-ventilated  
248 patients: a feasibility and clinical validity study. *Respir Res*, 20(1), 265.  
249 <https://doi.org/10.1186/s12931-019-1218-4>

250

251

252

## 253 **Supplement B: Other UltraSEQ Services**

254 **Other Context Services and Subservices.** Other services include a **Genetic Engineering**  
255 **(GE) Service** and a **Classifier Service**. The **GE Service enables** prediction of GE indicators,  
256 including microservices for detection of GE proteins, GE signatures, codon optimization, and  
257 codon re-coding. The Classifier Service includes artificial intelligence (AI) models to make  
258 alignment-free predictions on amino acid sequences; the output is the probability that the input  
259 is associated with a subset of threat metadata categories (the coarse functional categories)  
260 described in Gemler et al. (Gemler et al., 2022). Information from the context services are  
261 passed to the Prediction Services and Flagging System (Rules Engine) as described below.

262 **Region-based Taxonomy Prediction Subservice.** For other applications (such as forensic  
263 applications), sequence and region-level taxonomic information can be useful. For this  
264 prediction, a conservative and information-based approach is used that takes into consideration  
265 strength of alignments, the number of times a TaxID appears across alignments, and the  
266 taxonomic depth (species, genus, etc.). For this prediction, the TaxID frequency that each taxID  
267 appears across the top alignments is calculated, and TaxID Depth is assigned as follows: 100  
268 for species and below, 75 for genus, 50 for family, 30 for order, 20 for class, 15 for phylum, and  
269 10 for domain and above. A normalized TaxID Depth is then calculated in the same manner as  
270 the normalization defined in Equation 1 (**Supplemental Material A**). The TaxID score for each  
271 TaxID is then calculated according to Eq 2.

272 Equation 2

$$273 \text{TaxID Score} = \sqrt{w_d (\text{Normalized TaxID Depth})^2 + w_f (\text{TaxID Frequency})^2}$$

274 Where default weight values:  $w_d = 2.0$  and  $w_f = 1.0$  are used (optimized weights based on  
275 test/validation datasets, not shown). The final taxonomy predictions are then based on a 2-D K-  
276 means clustering for the alignment confidence and TaxID score data. The TaxIDs in the top  
277 cluster are considered the final predictions using the same K-means clustering methods as  
278 described above (the rest of the TaxID predictions are discarded. Further, the confidence  
279 associated with each TaxID prediction is reported as follows: taxonomy evidence is gathered for  
280 the region from the alignments and the alignment scores (percent identity x percent region  
281 coverage) are normalized by the max heuristic value (100 in the case of 100% identity over  
282 100% of the region). For each TaxID identified, this normalized score is considered the final  
283 confidence score associated with each TaxID.

284 **Region-based Function Prediction Subservice.** For each region, the function (gene ontology  
285 terms) is calculated in a similar manner. Specifically, 1) function evidence is gathered for each  
286 Region and alignment scores are normalized, 2) a 1-D K-means clustering is used for the  
287 alignment confidence; the GO Term sets in the top cluster are selected, and 3) the final function  
288 prediction confidence is calculated by averaging the alignment confidence values across the  
289 members in the top cluster.

290 **Region-based Threat Prediction Subservice.** For each region, the threat metadata  
291 associated with that region (damage, antibiotic resistance, adherence, etc. as defined in



292 (Gemler et al., 2022)) is tabulating the SoC alignment scores (percent identity x region  
293 coverage) associated with threat metadata category, clustering the scores using K-means,  
294 down selecting to only the top cluster, adding the alignment scores to 1/100<sup>th</sup> of the AI model,  
295 then dividing by the maximum possible score.

296

297 **References for Supplemental Section B**

- 298 1. Gemler, B. T., C., M., A., H. C., D., H., Z., S., J., H. L., O., T., & C., B. (2022). Function-based  
299 Classification of Hazardous Biological Sequences: Demonstration of a New Paradigm for  
300 Biohazard Assessments (Submitted for Publication).

301

302

| Bin    | Disease Diagnosis Confidence        | Qualifications                                                                                                                                                                                                                                                                                                                                                                                                                                                                                                                                                                                                                                                                         |
|--------|-------------------------------------|----------------------------------------------------------------------------------------------------------------------------------------------------------------------------------------------------------------------------------------------------------------------------------------------------------------------------------------------------------------------------------------------------------------------------------------------------------------------------------------------------------------------------------------------------------------------------------------------------------------------------------------------------------------------------------------|
| Bin 1A | Highest Confidence Agent            | <ol style="list-style-type: none"> <li>1. SoC Filter* is True AND</li> <li>2. SoC agent is a pathogen that infects human host AND</li> <li>3. Relative abundance filters (based on predicted reads): 1%-5% for bacteria**; &gt; 1%-2%** for fungi; &gt;1% for other (protozoa, etc.) AND</li> <li>4. SoC agent is contained in Battelle's human respiratory pathogen list (for respiratory datasets) or encephalitis/ meningitis pathogen list (for encephalitis datasets) AND***</li> <li>5. At least one SoC with the Active, Damage, Apoptosis, Inhibits, or Transmission threat category from the agent was used by UltraSEQ's metagenomics module for agent prediction</li> </ol> |
| Bin 1B | High Confidence Agent               | <ol style="list-style-type: none"> <li>1. SoC Filter* is False AND Conditions 2,3,4, and 5 above met</li> </ol>                                                                                                                                                                                                                                                                                                                                                                                                                                                                                                                                                                        |
| Bin 2  | Medium Confidence Respiratory Agent | <ol style="list-style-type: none"> <li>1. Condition 1A and Condition1B = FALSE AND Conditions 2 and 3 above met AND</li> <li>2. No SoCs identified from the above categories for that agent</li> </ol>                                                                                                                                                                                                                                                                                                                                                                                                                                                                                 |
| Bin 3  | Lowest Confidence Respiratory Agent | <ol style="list-style-type: none"> <li>1. Condition 1A and Condition1B = FALSE AND Conditions 2 and 3 above met AND</li> <li>2. There are SoCs from the above categories for that agent, however none are found [Note: other SoCs may be identified such as antibiotic resistant SoCs and adherence SoCs]</li> </ol>                                                                                                                                                                                                                                                                                                                                                                   |

304 \* SoC Filter is a condition that is true when the UltraSEQ metagenomics service uses a  
 305 UniRef100 cluster containing a SoC to trigger the taxonomy prediction.

306 \*\* For bacteria, a 5% threshold was used for the de Vries et al., PRJNA516289, Hasan et al.,  
 307 PRJEB7888, PRJEB13360; a 1% bacteria filter was used for all other datasets; for fungi, a 2%  
 308 filter was used PRJNA516582; a 1% fungi filter was used for all other datasets

309 \*\*\* At the time of this manuscript, Battelle's SoC database contained ~2,200 human pathogen  
 310 species, ~150 of which are curated as potential contaminants (either from reagents used during  
 311 sequencing and/or due to the biological sample such as normal skin flora; all of these  
 312 annotations are provided in the sample report. Of the human pathogens, ~250 are contained  
 313 within the encephalitis/ meningitis list and ~250 are contained within the respiratory list.

314

315

316 **Supplement F - Supplemental Results**  
 317 **Encephalitis / meningitis**  
 318 **PRJNA516289 (Miller et al. (Miller et al., 2019)).**

319 **Table F1. UltraSEQ Results for Miller Dataset**

| Result       | Parasites    |            | Fungi        |            | Bacteria     |            | DNA Viruses  |            | RNA Viruses  |            |
|--------------|--------------|------------|--------------|------------|--------------|------------|--------------|------------|--------------|------------|
|              | UltraSE<br>Q | Mille<br>r | UltraSE<br>Q | Mille<br>r | UltraSE<br>Q | Mill<br>er | UltraSE<br>Q | Mille<br>r | UltraSE<br>Q | Mille<br>r |
| TP           | 1            | 1          | 10           | 9          | 6            | 5          | 23           | 25         | 10           | 11         |
| FP           | 0            | 0          | 0            | 0          | 0            | 1          | 0            | 0          | 0            | 0          |
| FN           | 0            | 0          | 0            | 1          | 1            | 2          | 5            | 3          | 3            | 2          |
| TN           | 4            | 4          | 38           | 38         | 51           | 50         | 16           | 16         | 5            | 5          |
| PPA          | 100%         | 100<br>%   | 100%         | 90%        | 86%          | 71<br>%    | 82%          | 89%        | 77%          | 85%        |
| NPA          | 100%         | 100<br>%   | 100%         | 100<br>%   | 100%         | 98<br>%    | 100%         | 100<br>%   | 100%         | 100<br>%   |
| Accura<br>cy | 100%         | 100<br>%   | 100%         | 98%        | 98%          | 95<br>%    | 87%          | 93%        | 83%          | 89%        |

320 \* As noted by Miller et al., the “truth” was considered the initial clinical result unless a confirmatory test was run (i.e., if  
 321 a confirmatory test was run by Miller et al., the truth was considered to be the confirmatory test). For both SURPI and  
 322 UltraSEQ, RNA viruses were reported using sequences derived from the RNA libraries, whereas all other organisms  
 323 results were based on sequences from the DNA libraries.

324  
 325 **PRJNA516582 (Saha et al. (Saha et al., 2019)).**

326 **Table F2: Summary of Results for Saha and UltraSEQ**

| Result | Saha Results   |                 |                           |                | UltraSEQ Results |                 |                           |                |
|--------|----------------|-----------------|---------------------------|----------------|------------------|-----------------|---------------------------|----------------|
|        | All<br>samples | Culture<br>Only | All<br>confirmed<br>Cases | CHIKV<br>cases | All<br>samples   | Culture<br>Only | All<br>confirmed<br>Cases | CHIKV<br>cases |
| TP     | 52             | 7               | 24                        | 17             | 53               | 7               | 25                        | 17             |
| FP     | NR*            | NR*             | NR*                       | NR*            | 0                | 0               | 0                         | 0              |
| FN     | 12             | 1               | 12                        | 0              | 11               | 1               | 11                        | 0              |
| TN     | 29             | N/A             | N/A                       | N/A            | 29               | N/A             | N/A                       | N/A            |
| PPA    | 81%            | 88%             | 67%                       | 100%           | 83%              | 88%             | 72%                       | 100%           |
| NPA    | N/A            | N/A             | N/A                       | N/A            | 100%             | N/A             | N/A                       | N/A            |
| ACC    | 87%            | 88%             | 67%                       | 100%           | 88%              | 88%             | 72%                       | 100%           |

327 \* NR= not reported; N/A=not applicable (i.e., could not be calculated)

328 \*\* As detailed in the methods, UltraSEQ identified *E. coli* in nearly every sample despite the fact  
 329 that *E. coli* was only identified by clinical tests in 2 samples. By using the UltraSEQ logic as  
 330 defined in the Methods section without any background sample subtraction (as required by  
 331 Saha), UltraSEQ was able to remove all *E. coli* false positives.

332

333 'CSF\_metagenomics' from idseq.net (Hasan et al. (Hasan et al., 2020)).

334 Table F3: Table of Species Identified by UltraSEQ for Sample CW322

| Taxonomy Name                 | TaxID | NCBI TaxID Rank | Type     | Confidence | Relative Abundance TaxID + Children (vs PREDICTED ONLY reads) |
|-------------------------------|-------|-----------------|----------|------------|---------------------------------------------------------------|
| <i>Neisseria meningitidis</i> | 487   | species         | Bacteria | 99.4       | 99.96                                                         |
| Human alphaherpesvirus 2      | 10310 | species         | Virus    | 99.0       | 0.0025                                                        |

335

336

337

CW322 Share Download

Sample Details

Metagenomic

Taxon name  Name Type: Scientific Background: CSF\_Metagenomics\_BG Categories: 3 Threshold filters Read Specificity: All

Bacteria Viruses Phage

178 rows passing the above filters, out of 208 total rows. Clear All Filters

| Taxon                                                                 | Score       | Z Score        | rPM                | r                  | contig         | contig r           | %id           | L                | E value                                  | NT NR |
|-----------------------------------------------------------------------|-------------|----------------|--------------------|--------------------|----------------|--------------------|---------------|------------------|------------------------------------------|-------|
| > Neisseria ( 22 bacterial species: ● 2 )                             | 158,368,898 | 99.0<br>99.0   | 8,437.2<br>8,276.6 | 128,225<br>125,784 | 1,227<br>1,226 | 119,585<br>119,545 | 99.1<br>98.9  | 2,851.3<br>375.8 | 10 <sup>-292</sup><br>10 <sup>-259</sup> |       |
| > Cutibacterium ( 2 bacterial species )                               | -0          | -0.2<br>-0.2   | 4.1<br>2.7         | 62<br>41           | 0<br>0         | 0<br>0             | 99.5<br>99.9  | 155.3<br>54.7    | 10 <sup>-95</sup><br>10 <sup>-297</sup>  |       |
| > Morococcus ( 1 bacterial species )                                  | 26,320      | 0.0<br>100.0   | 0.0<br>2.6         | 0<br>40            | 0<br>1         | 0<br>40            | 0.0<br>97.5   | 0.0<br>157.0     | 0<br>10 <sup>-105</sup>                  |       |
| > Escherichia ( 1 bacterial species: ● 1 )                            | -0          | -0.2<br>-0.2   | 2.0<br>1.9         | 30<br>29           | 0<br>0         | 0<br>0             | 99.9<br>98.9  | 306.3<br>91.2    | 10 <sup>-208</sup><br>10 <sup>-211</sup> |       |
| > Pseudomonas ( 14 bacterial species )                                | 3           | -0.2<br>-0.2   | 1.1<br>1.1         | 16<br>16           | 0<br>0         | 0<br>0             | 99.4<br>100.0 | 186.7<br>63.8    | 10 <sup>-121</sup><br>10 <sup>-279</sup> |       |
| > Staphylococcus ( 4 bacterial species: ● 1 )                         | 0           | -0.2<br>-0.2   | 0.8<br>1.0         | 12<br>15           | 0<br>1         | 0<br>4             | 99.9<br>99.8  | 148.2<br>76.7    | 10 <sup>-89</sup><br>10 <sup>-252</sup>  |       |
| > all taxa with neither family nor genus classification ( 7 species ) | 6           | -0.2<br>-0.2   | 0.7<br>0.9         | 10<br>14           | 2<br>0         | 8<br>0             | 100.0<br>88.8 | 423.7<br>87.9    | 10 <sup>-277</sup><br>10 <sup>-205</sup> |       |
| > Clostridioides ( 1 bacterial species: ● 1 )                         | 2,133       | -100.0<br>52.0 | 0.0<br>0.8         | 0<br>12            | 0<br>0         | 0<br>0             | 0.0<br>96.2   | 0.0<br>36.8      | 0<br>10 <sup>-308</sup>                  |       |
| > Propionibacterium ( 6 bacterial species )                           | 0           | -0.2<br>-0.2   | 0.3<br>0.5         | 4<br>7             | 0<br>0         | 0<br>0             | 99.9<br>100.0 | 202.0<br>51.9    | 10 <sup>-126</sup><br>10 <sup>-308</sup> |       |
| ▼ Simplexvirus ( 1 viral species: ● 1 )                               | 2,916       | 10.8<br>100.0  | 0.3<br>0.3         | 4<br>4             | 0<br>0         | 0<br>0             | 99.8<br>99.7  | 216.0<br>64.0    | 10 <sup>-135</sup><br>10 <sup>-308</sup> |       |
| Human alphaherpesvirus 2 <span>Known Pathogen</span>                  | 2,916       | 100.0<br>100.0 | 0.3<br>0.3         | 4<br>4             | 0<br>0         | 0<br>0             | 99.8<br>99.7  | 216.0<br>64.0    | 10 <sup>-135</sup><br>10 <sup>-308</sup> |       |
| > Mycoplasma ( 2 bacterial species )                                  | 61          | -0.2<br>15.2   | 0.1<br>0.3         | 2<br>4             | 0<br>1         | 0<br>4             | 95.8<br>98.5  | 24.0<br>66.0     | 10 <sup>-3</sup><br>10 <sup>-40</sup>    |       |
| > Francisella ( 1 bacterial species )                                 | -0          | -100.0<br>-0.2 | 0.0<br>0.3         | 0<br>4             | 0<br>0         | 0<br>0             | 0.0<br>100.0  | 0.0<br>33.0      | 0<br>10 <sup>-308</sup>                  |       |
| > Zhizhongheella ( 1 bacterial species )                              | 0           | 0.0<br>0.4     | 0.0<br>0.1         | 0<br>2             | 0<br>0         | 0<br>0             | 0.0<br>90.5   | 0.0<br>47.0      | 0<br>10 <sup>-308</sup>                  |       |

338

339 **Figure F1: CW322 Results Showing Bacteria and Viruses Identified by IdSeq (Note that several**  
 340 **more rows of genera were identified and not shown here).**

341

342

343

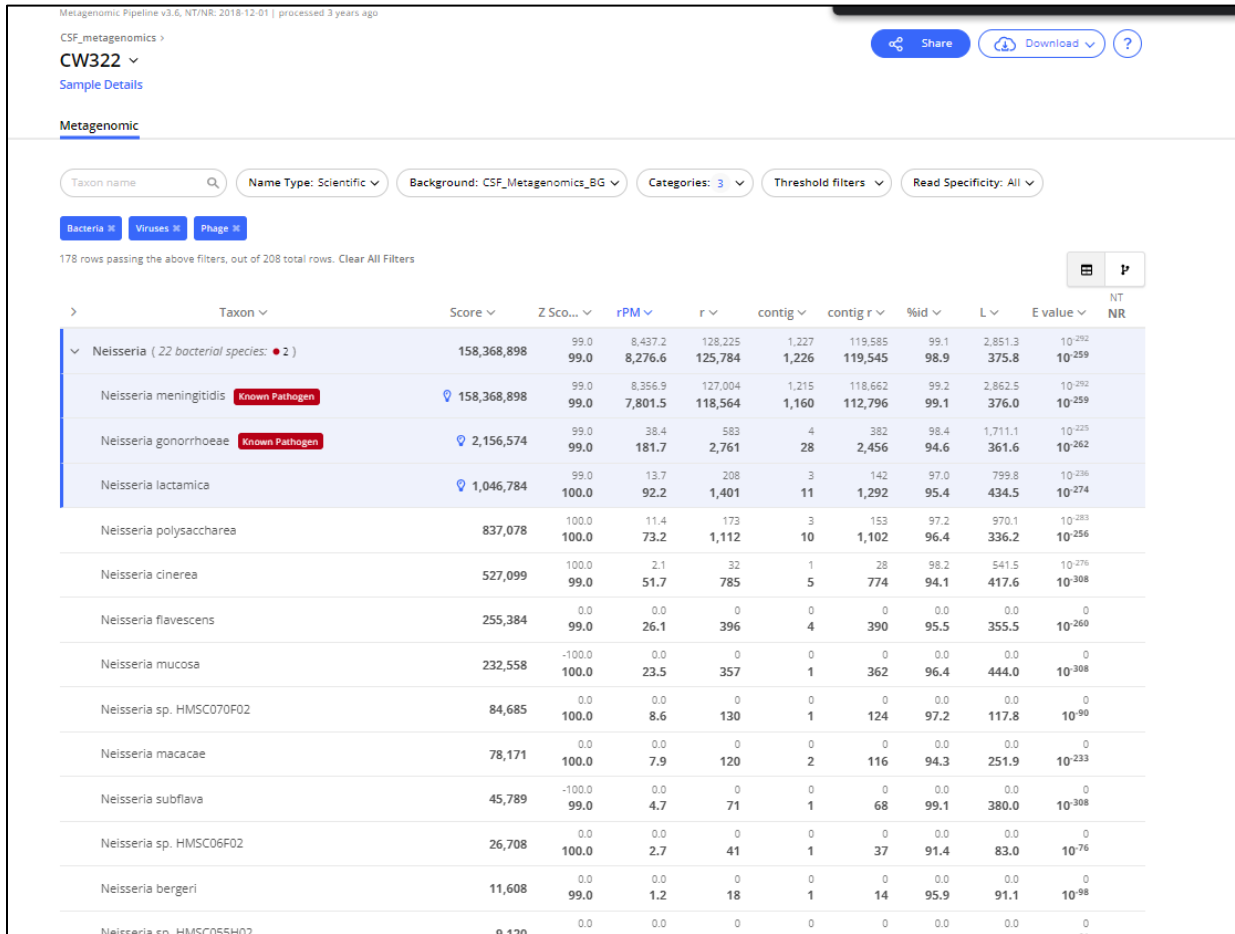

344 **Figure F2: CW322 Results Showing all Neisseria Species Identified (Note that several more**  
 345 **rows of species were identified and not shown here).**

347

348 **Respiratory disease: Influenza**

349 **PRJEB7888 (Fischer et al. (Fischer et al., 2015)).**

350 **Table F4: Summary of Results for Fischer and UltraSEQ**

| Pipeline | TP | FN | TN | FP | PPA | NPA  | Accuracy |
|----------|----|----|----|----|-----|------|----------|
| Explify  | 16 | 3  | 5  | 0  | 84% | 100% | 83%      |
| Fisher   | 15 | 4  | 5  | 0  | 79% | 100% | 88%      |

|              |    |   |   |   |     |      |     |
|--------------|----|---|---|---|-----|------|-----|
| UltraSE<br>Q | 14 | 5 | 5 | 0 | 74% | 100% | 79% |
|--------------|----|---|---|---|-----|------|-----|

351

352

353 **Respiratory disease: ventilator associated pneumonia (VAP)**

354 ***PRJNA554856 (Watts et al. (Watts et al., 2019)).***

355

**Table F5: AbR Report for SRR9693434 (Patient 2, Day 1)**

|                                                 |  |                                                                                                                                                                                                                                                                                                                                                                                                                                                                                                                                                                                          |                                                                                                               |                                                                 |                                                                                                                                             |
|-------------------------------------------------|--|------------------------------------------------------------------------------------------------------------------------------------------------------------------------------------------------------------------------------------------------------------------------------------------------------------------------------------------------------------------------------------------------------------------------------------------------------------------------------------------------------------------------------------------------------------------------------------------|---------------------------------------------------------------------------------------------------------------|-----------------------------------------------------------------|---------------------------------------------------------------------------------------------------------------------------------------------|
|                                                 |  |                                                                                                                                                                                                                                                                                                                                                                                                                                                                                                                                                                                          |                                                                                                               |                                                                 |                                                                                                                                             |
| <b>fluoroquinolone antibiotic (ARO:0000001)</b> |  | ['major facilitator superfamily (MFS) antibiotic efflux pump (ARO:0010002)', 'Staphylococcus aureus norA', ['ARO:3004667'], 31, 0.016, '0']<br>['major facilitator superfamily (MFS) antibiotic efflux pump (ARO:0010002)', 'Staphylococcus aureus norA', ['ARO:3004667'], 31, 0.016, '0']<br>['major facilitator superfamily (MFS) antibiotic efflux pump (ARO:0010002)', 'Staphylococcus aureus norA', ['ARO:3004667'], 31, 0.016, '0']<br>['major facilitator superfamily (MFS) antibiotic efflux pump (ARO:0010002)', 'Staphylococcus aureus norA', ['ARO:3004667'], 31, 0.016, '0'] | ciprofloxacin (ARO:0000036)<br>enoxacin (ARO:0000023)<br>ofloxacin (ARO:3000663)<br>norfloxacin (ARO:3000662) | ['Staphylococcus aureus norA', ['ARO:3004667'], 31, 0.016, '0'] | ['major facilitator superfamily (MFS) antibiotic efflux pump (ARO:0010002)', 'Staphylococcus aureus norA', ['ARO:3004667'], 31, 0.016, '0'] |
| <b>phosphonic acid antibiotic (ARO:0000025)</b> |  | ['fosfomycin thiol transferase (ARO:3000133)', 'FosD', ['ARO:3004674'], 1, 0.001, '0']                                                                                                                                                                                                                                                                                                                                                                                                                                                                                                   |                                                                                                               |                                                                 |                                                                                                                                             |

|                                                     |                                                |                                                                                                                                                                                                                                                                                                                                                                                                                                                                                                                       |                                                                                                                                                                                                                                                                                                     |                                                                                                 |                                                                                                                                                                                                                       |
|-----------------------------------------------------|------------------------------------------------|-----------------------------------------------------------------------------------------------------------------------------------------------------------------------------------------------------------------------------------------------------------------------------------------------------------------------------------------------------------------------------------------------------------------------------------------------------------------------------------------------------------------------|-----------------------------------------------------------------------------------------------------------------------------------------------------------------------------------------------------------------------------------------------------------------------------------------------------|-------------------------------------------------------------------------------------------------|-----------------------------------------------------------------------------------------------------------------------------------------------------------------------------------------------------------------------|
| <b>glycylcycline<br/>(ARO:0000042)</b>              | ['mepA',<br>[ARO:3000026'],<br>44, 0.023, '0'] | ['multidrug and toxic<br>compound extrusion<br>(MATE) transporter<br>(ARO:3000112)', 'mepA',<br>[ARO:3000026'], 44,<br>0.023, '0']                                                                                                                                                                                                                                                                                                                                                                                    | tigecycline<br>(ARO:0000030)                                                                                                                                                                                                                                                                        | ['mepA',<br>[ARO:3000026'],<br>44, 0.023, '0']                                                  | ['multidrug and toxic<br>compound<br>extrusion (MATE)<br>transporter<br>(ARO:3000112)',<br>'mepA',<br>[ARO:3000026'],<br>44, 0.023, '0']                                                                              |
| <b>lincosamide<br/>antibiotic<br/>(ARO:0000017)</b> |                                                | ['ABC-F ATP-binding<br>cassette ribosomal<br>protection protein<br>(ARO:3004469)', 'poxTA',<br>[ARO:3004470'], 6,<br>0.003, '0']<br>['ABC-F ATP-binding<br>cassette ribosomal<br>protection protein<br>(ARO:3004469)', 'vgaA',<br>[ARO:3002829'], 1,<br>0.001, '0']<br>['ABC-F ATP-binding<br>cassette ribosomal<br>protection protein<br>(ARO:3004469)', 'vgaC',<br>[ARO:3002831'], 1,<br>0.001, '0']                                                                                                                |                                                                                                                                                                                                                                                                                                     |                                                                                                 |                                                                                                                                                                                                                       |
| <b>macrolide<br/>antibiotic<br/>(ARO:0000000)</b>   |                                                | ['macrolide<br>phosphotransferase<br>(MPH) (ARO:3000333)',<br>'mphC',<br>[ARO:3000319'], 72,<br>0.037, '0']<br>['ABC-F ATP-binding<br>cassette ribosomal<br>protection protein<br>(ARO:3004469)', 'poxTA',<br>[ARO:3004470'], 6,<br>0.003, '0']<br>['ABC-F ATP-binding<br>cassette ribosomal<br>protection protein<br>(ARO:3004469)', 'vgaA',<br>[ARO:3002829'], 1,<br>0.001, '0']<br>['ABC-F ATP-binding<br>cassette ribosomal<br>protection protein<br>(ARO:3004469)', 'vgaC',<br>[ARO:3002831'], 1,<br>0.001, '0'] | spiramycin<br>(ARO:3000156)<br>clarithromycin<br>(ARO:0000065)<br>roxithromycin<br>(ARO:0000027)<br>tylosin<br>(ARO:3000145)<br>oleandomycin<br>(ARO:3000867)<br>azithromycin<br>(ARO:3000158)<br>erythromycin<br>(ARO:0000006)<br>dirithromycin<br>(ARO:3000176)<br>telithromycin<br>(ARO:0000057) | ['mphC',<br>[ARO:3000319'],<br>72, 0.037, '0']                                                  | ['macrolide<br>phosphotransferase<br>(MPH)<br>(ARO:3000333)',<br>'mphC',<br>[ARO:3000319'],<br>72, 0.037, '0']                                                                                                        |
| <b>mupirocin<br/>(ARO:3000554)</b>                  |                                                | ['antibiotic-resistant<br>isoleucyl-tRNA<br>synthetase (ileS)<br>(ARO:3000446)', 'mupA',<br>[ARO:3000521'], 10,<br>0.005, '1']<br>['antibiotic-resistant<br>isoleucyl-tRNA<br>synthetase (ileS)<br>(ARO:3000446)', 'mupB',                                                                                                                                                                                                                                                                                            | mupirocin<br>(ARO:3000554)                                                                                                                                                                                                                                                                          | ['mupA',<br>[ARO:3000521'],<br>10, 0.005, '1']<br>['mupB',<br>[ARO:3000510'],<br>2, 0.001, '1'] | ['antibiotic-resistant<br>isoleucyl-tRNA<br>synthetase (ileS)<br>(ARO:3000446)',<br>'mupA',<br>[ARO:3000521'],<br>10, 0.005, '1']<br>['antibiotic-resistant<br>isoleucyl-tRNA<br>synthetase (ileS)<br>(ARO:3000446)', |

|                                               |  |                                                                                                                                                                                                                                                                                                                                                              |                                                            |                                           |                                                                                                                    |
|-----------------------------------------------|--|--------------------------------------------------------------------------------------------------------------------------------------------------------------------------------------------------------------------------------------------------------------------------------------------------------------------------------------------------------------|------------------------------------------------------------|-------------------------------------------|--------------------------------------------------------------------------------------------------------------------|
|                                               |  | ['ARO:3000510'], 2, 0.001, '1']                                                                                                                                                                                                                                                                                                                              |                                                            |                                           | 'mupB', ['ARO:3000510'], 2, 0.001, '1']                                                                            |
| <b>oxazolidinone antibiotic (ARO:3000079)</b> |  | ['ABC-F ATP-binding cassette ribosomal protection protein (ARO:3004469)', 'poxtA', ['ARO:3004470'], 6, 0.003, '0']<br>['ABC-F ATP-binding cassette ribosomal protection protein (ARO:3004469)', 'vgaA', ['ARO:3002829'], 1, 0.001, '0']<br>['ABC-F ATP-binding cassette ribosomal protection protein (ARO:3004469)', 'vgaC', ['ARO:3002831'], 1, 0.001, '0'] | linezolid (ARO:0000072)                                    | ['poxtA', ['ARO:3004470'], 6, 0.003, '0'] | ['ABC-F ATP-binding cassette ribosomal protection protein (ARO:3004469)', 'poxtA', ['ARO:3004470'], 6, 0.003, '0'] |
| <b>penam (ARO:3000008)</b>                    |  | ['methicillin resistant PBP2 (ARO:3001208)', 'mecA', ['ARO:3000617'], 35, 0.018, '0']                                                                                                                                                                                                                                                                        | methicillin (ARO:0000015)                                  | ['mecA', ['ARO:3000617'], 35, 0.018, '0'] | ['methicillin resistant PBP2 (ARO:3001208)', 'mecA', ['ARO:3000617'], 35, 0.018, '0']                              |
| <b>phenicol antibiotic (ARO:3000387)</b>      |  | ['ABC-F ATP-binding cassette ribosomal protection protein (ARO:3004469)', 'poxtA', ['ARO:3004470'], 6, 0.003, '0']<br>['ABC-F ATP-binding cassette ribosomal protection protein (ARO:3004469)', 'vgaA', ['ARO:3002829'], 1, 0.001, '0']<br>['ABC-F ATP-binding cassette ribosomal protection protein (ARO:3004469)', 'vgaC', ['ARO:3002831'], 1, 0.001, '0'] | chloramphenicol (ARO:3000385)<br>florfenicol (ARO:3000461) | ['poxtA', ['ARO:3004470'], 6, 0.003, '0'] | ['ABC-F ATP-binding cassette ribosomal protection protein (ARO:3004469)', 'poxtA', ['ARO:3004470'], 6, 0.003, '0'] |

356

357 **PRJNA554461 (Yang et al. (Yang et al., 2019)).**

358

359 **Table F6.** Comparison of UltraSEQ and WIMP Results for the Yang et al. (PRJNA554461) VAP  
360 Dataset

| Platform | TPs | FNs | TNs | FPs | PPA | NPA | Accuracy |
|----------|-----|-----|-----|-----|-----|-----|----------|
|----------|-----|-----|-----|-----|-----|-----|----------|



361  
362

|               |    |   |   |   | [TP / (TP+FN)] | [TN / (TN +FP)] |     |
|---------------|----|---|---|---|----------------|-----------------|-----|
| WIMP (Author) | 10 | 2 | 6 | 7 | 83%            | 46%             | 64% |
| UltraSEQ      | 9  | 3 | 5 | 3 | 75%            | 63%             | 70% |

**Table F7.** UltraSEQ's Antibiotic Genotype Profiles Agree with Phenotypic Profiles.

| Case | AbR profile by culture*                                                                       | UltraSEQ AbR summary for Identified Pathogen w/ # reads**<br>Drug class<br>Antibiotic                                                                                                                                                                                                                                  | Author results                                                                                        |
|------|-----------------------------------------------------------------------------------------------|------------------------------------------------------------------------------------------------------------------------------------------------------------------------------------------------------------------------------------------------------------------------------------------------------------------------|-------------------------------------------------------------------------------------------------------|
| 1    | R: ticarcillin/<br>clavulanic acid<br>R: ceftazidime<br>I: levofloxacin<br>NT: Tetracycline   | Cephalosporin (beta lactam): 2 reads<br><br><b>Note: Others identified as well; fluoroquinolone identified in agent agnostic report</b>                                                                                                                                                                                | blaTEM-4,blaTEM-112, blaTEM-157, blaACT-5, oqxB, tetC                                                 |
| 2    | R: methicillin<br><br>R: erythromycin, clindamycin                                            | Penam (beta lactam): 2 reads<br>methicillin: 10 reads<br>Macrolide:<br>Roxithromycin, oleandomycin, telithromycin, spiramycin, azithromycin, clarithromycin, erythromycin, tylosin, dirithromycin: 17 reads<br>lincosamide:<br>clindamycin, lincomycin: 17 reads<br><br><b>Note: several others identified as well</b> | mecA<br><br>ermA, erm<br><br>tet38,ant(4')-Ib, tetC, blaTEM-4                                         |
| 3    | I: tetracycline                                                                               | Tetracycline:<br>Tetracycline: 3 reads<br>Tigecycline: 3 reads<br><br>No Methicillin resistance identified<br><b>Note: several others identified as well but all 2 reads or less; included all strains of S. aureus identified</b>                                                                                     | tetK, tet38, tetQ                                                                                     |
| 4    | R: tetracycline<br><br>R: Trimethoprim-sulfamethoxazole<br><br>R: ciprofloxacin, levofloxacin | Tetracycline:<br>Tetracycline: 14 reads<br>Minocycline, demeclocycline, oxytetracycline, chlortetracycline, doxycycline: 4 reads<br>Diaminopyrimidine:<br>Trimethoprim: 1 read                                                                                                                                         | tetX<br>sul1<br>dfrA<br>acrF, pare, mdf<br>mphA, aadA5,<br>vgaC, blaACT-5,<br>blaACT-14, mefA,<br>mel |

|   |                      |                                                                                                                                         |                                     |
|---|----------------------|-----------------------------------------------------------------------------------------------------------------------------------------|-------------------------------------|
|   |                      | <b>Note: Aminoglycosides and macrolides identified as well (&gt;10 reads each); fluoroquinolone identified in agent agnostic report</b> |                                     |
| 5 | S: all tested agents | None<br>No Methicillin resistance identified                                                                                            | None                                |
| 6 | S: all tested agents | <b>Note: 7 classes identified, all with 2 reads or less</b><br>No Methicillin resistance identified                                     | Tet38, blaTEM4                      |
| 7 | S: all tested agents | N/A                                                                                                                                     | None                                |
| 8 | NT                   | <b>Note: 56 reads to drug efflux protein conferring resistance to multiple drug classes</b>                                             | tetM, isaC, sul1, tetQ, mphA, aadA5 |

363 \* R=resistant, I=intermediate, S=Susceptible, NT=Not tested; N/A = not applicable

364 \*\* Only appropriate true positives and true negatives are listed (full AbR phenotype is unknown).

365 Results in **green** font indicate that for the identified pathogen, UltraSEQ identified the same  
366 antibiotic or class as the phenotype data; those in **blue** denote that UltraSEQ identified a closely  
367 related class; those in **orange** indicate that that the antibiotic was only identified in the agent  
368 agnostic report; those in *italics* were not phenotypically tested.

369

370 **Illumina RNASeq Dataset: Respiratory viruses**

371 **PRJEB13360 (Graf, Flygare (Flygare et al., 2016; Graf et al., 2016)).** Detailed results are  
372 provided in **Supplement D – Supplemental\_File\_Scores.xlsx.**

373 **Illumina RNASeq Dataset: nasopharyngeal swabs for SARS-CoV-2 diagnosis**

374 **PRJNA634356 (Babiker et al (Babiker et al., 2020)).**

375

376 **Table F8.** Comparison of UltraSEQ Results to Babiker et al. (KrakenUniq) and Explify

| Platform               | TPs | FNs | TNs | FPs | PPA<br>[TP / (TP+FN)] | NPA<br>[TN / (TN<br>+FP)] | Accuracy |
|------------------------|-----|-----|-----|-----|-----------------------|---------------------------|----------|
| Author<br>(KrakenUniq) | 26  | 1   | 17  | 1   | 96%                   | 94%                       | 96%      |
| Explify                | 20  | 3   | 16  | 0   | 86%                   | 100%                      | 93%      |
| UltraSEQ               | 27  | 0   | 16  | 2   | 100%                  | 89%                       | 96%      |

377

378 **Mixed:**

379 **de Vries et al. Dataset.** (<https://veb.lumc.nl/CliniMG>)

380 **Table F9.** UltraSEQ Results for the de Vries Dataset Compared to Other Pipelines as Reported  
 381 in (de Vries et al., 2021)

| Pipeline         | Positive predictive value (PPV) [%]* | PPA (Sensitivity) [%]* |
|------------------|--------------------------------------|------------------------|
| <b>UltraSEQ</b>  | <b>100</b>                           | <b>92</b>              |
| Centrifuge       | 100                                  | 92                     |
| DAMIAN           | 100                                  | 77                     |
| DIAMOND          | 93                                   | 85                     |
| DNASTAR          | 71                                   | 100                    |
| FEVIR            | 88                                   | 100                    |
| Genome Detective | 100                                  | 85                     |
| Jovian           | 100                                  | 77                     |
| MetaMIC          | 100                                  | 77                     |
| metaMix          | 100                                  | 100                    |
| One Codex        | 100                                  | 77                     |
| RIEMS            | 81                                   | 85                     |
| Taxonomer        | 100                                  | 85                     |
| VirMet           | 93                                   | 92                     |

382 \* PPV and PPA for UltraSEQ results were determined as described in the Methods Section.  
 383 PPA and PPV for all other datasets determined as reported in Supplemental Table 2 and 4,  
 384 respectively in (de Vries et al., 2021).

385

386 **Mixed Illumina RNASeq Dataset: In-house COVID-19 Saliva Study**

387 **Battelle (PRJNA856680).**

388 Detailed results provided in Supplement D – Supplemental\_File\_Scores.xlsx.

389

390 **References for Supplemental Section F**

- 391 1. Babiker, A., Bradley, H. L., Stittleburg, V. D., Ingersoll, J. M., Key, A., Kraft, C. S., Waggoner, J. J., &  
392 Piantadosi, A. (2020). Metagenomic Sequencing To Detect Respiratory Viruses in Persons under  
393 Investigation for COVID-19. *J Clin Microbiol*, 59(1). <https://doi.org/10.1128/JCM.02142-20>
- 394 2. de Vries, J. J. C., Brown, J. R., Fischer, N., Sidorov, I. A., Morfopoulou, S., Huang, J., Munnink, B.  
395 B. O., Sayiner, A., Bulgurcu, A., Rodriguez, C., Gricourt, G., Keyaerts, E., Beller, L., Bachofen, C.,  
396 Kubacki, J., Samuel, C., Florian, L., Dennis, S., Beer, M., . . . Claas, E. C. J. (2021). Benchmark of  
397 thirteen bioinformatic pipelines for metagenomic virus diagnostics using datasets from clinical  
398 samples. *J Clin Virol*, 141, 104908. <https://doi.org/10.1016/j.jcv.2021.104908>
- 399 3. Fischer, N., Indenbirken, D., Meyer, T., Lutgehetmann, M., Lellek, H., Spohn, M., Aepfelbacher,  
400 M., Alawi, M., & Grundhoff, A. (2015). Evaluation of Unbiased Next-Generation Sequencing of  
401 RNA (RNA-seq) as a Diagnostic Method in Influenza Virus-Positive Respiratory Samples. *J Clin*  
402 *Microbiol*, 53(7), 2238-2250. <https://doi.org/10.1128/JCM.02495-14>
- 403 4. Flygare, S., Simmon, K., Miller, C., Qiao, Y., Kennedy, B., Di Sera, T., Graf, E. H., Tardif, K. D.,  
404 Kapusta, A., Rynearson, S., Stockmann, C., Queen, K., Tong, S., Voelkerding, K. V., Blaschke, A.,  
405 Byington, C. L., Jain, S., Pavia, A., Ampofo, K., . . . Schlager, R. (2016). Taxonomer: an interactive  
406 metagenomics analysis portal for universal pathogen detection and host mRNA expression  
407 profiling. *Genome Biol*, 17(1), 111. <https://doi.org/10.1186/s13059-016-0969-1>
- 408 5. Graf, E. H., Simmon, K. E., Tardif, K. D., Hymas, W., Flygare, S., Eilbeck, K., Yandell, M., &  
409 Schlager, R. (2016). Unbiased Detection of Respiratory Viruses by Use of RNA Sequencing-  
410 Based Metagenomics: a Systematic Comparison to a Commercial PCR Panel. *J Clin Microbiol*,  
411 54(4), 1000-1007. <https://doi.org/10.1128/JCM.03060-15>
- 412 6. Hasan, M. R., Sundararaju, S., Tang, P., Tsui, K. M., Lopez, A. P., Janahi, M., Tan, R., & Tilley, P.  
413 (2020). A metagenomics-based diagnostic approach for central nervous system infections in  
414 hospital acute care setting. *Sci Rep*, 10(1), 11194. <https://doi.org/10.1038/s41598-020-68159-z>
- 415 7. Miller, S., Naccache, S. N., Samayoa, E., Messacar, K., Arevalo, S., Federman, S., Stryke, D., Pham,  
416 E., Fung, B., Bolosky, W. J., Ingebrigtsen, D., Lorizio, W., Paff, S. M., Leake, J. A., Pesano, R.,  
417 DeBiasi, R., Dominguez, S., & Chiu, C. Y. (2019). Laboratory validation of a clinical metagenomic  
418 sequencing assay for pathogen detection in cerebrospinal fluid. *Genome Res*, 29(5), 831-842.  
419 <https://doi.org/10.1101/gr.238170.118>
- 420 8. Saha, S., Ramesh, A., Kalantar, K., Malaker, R., Hasanuzzaman, M., Khan, L. M., Mayday, M. Y.,  
421 Sajib, M. S. I., Li, L. M., Langelier, C., Rahman, H., Crawford, E. D., Tato, C. M., Islam, M., Juan, Y.  
422 F., de Bourcy, C., Dimitrov, B., Wang, J., Tang, J., . . . DeRisi, J. L. (2019). Unbiased Metagenomic  
423 Sequencing for Pediatric Meningitis in Bangladesh Reveals Neuroinvasive Chikungunya Virus  
424 Outbreak and Other Unrealized Pathogens. *mBio*, 10(6). <https://doi.org/10.1128/mBio.02877-19>
- 425 9. Watts, G. S., Thornton, J. E., Jr., Youens-Clark, K., Ponsero, A. J., Slepian, M. J., Menashi, E., Hu,  
426 C., Deng, W., Armstrong, D. G., Reed, S., Cranmer, L. D., & Hurwitz, B. L. (2019). Identification  
427 and quantitation of clinically relevant microbes in patient samples: Comparison of three k-mer  
428 based classifiers for speed, accuracy, and sensitivity. *PLoS Comput Biol*, 15(11), e1006863.  
429 <https://doi.org/10.1371/journal.pcbi.1006863>
- 430 10. Yang, L., Haidar, G., Zia, H., Nettles, R., Qin, S., Wang, X., Shah, F., Rapport, S. F., Charalampous,  
431 T., Methe, B., Fitch, A., Morris, A., McVerry, B. J., O'Grady, J., & Kitsios, G. D. (2019).  
432 Metagenomic identification of severe pneumonia pathogens in mechanically-ventilated  
433 patients: a feasibility and clinical validity study. *Respir Res*, 20(1), 265.  
434 <https://doi.org/10.1186/s12931-019-1218-4>
